1           **Contribution of the  $\beta$ -glucosidase BglC to the Onset of the Pathogenic**

2                           **Lifestyle of *Streptomyces scabies***

3  
4   Samuel Jourdan<sup>1,†</sup>, Isolde M. Francis<sup>2,3,†</sup>, Benoit Deflandre<sup>1</sup>, Elodie Tenconi<sup>1</sup>, Jennifer Riley<sup>3</sup>,  
5   Sören Planckaert<sup>4</sup>, Pierre Tocquin<sup>5</sup>, Loïc Martinet<sup>1</sup>, Bart Devreese<sup>4</sup>, Rosemary Loria<sup>2,§</sup>, and  
6                                           Sébastien Rigali<sup>1,§,\*</sup>

7  
8   <sup>1</sup> InBioS – Center for Protein Engineering, University of Liège, Institut de Chimie, B6a, B-  
9   4000, Liège, Belgium

10   <sup>2</sup> Department of Plant Pathology, University of Florida, Gainesville, FL, USA

11   <sup>3</sup> Department of Biology, California State University, Bakersfield, CA, USA

12   <sup>4</sup> Laboratory for Protein Biochemistry and Biomolecular Engineering, Department of  
13   Biochemistry and Microbiology, Ghent University, B-9000, Ghent, Belgium

14   <sup>5</sup> InBioS – CARE PhytoSYSTEMS, University of Liège, Institut de Botanique, B22, B-4000,  
15   Liège, Belgium

16  
17   <sup>†</sup> These authors contributed equally to this work.

18   <sup>§</sup> These authors jointly supervised this work.

19   \* Corresponding author. E-mail: [srigali@ulg.ac.be](mailto:srigali@ulg.ac.be); Tel: +32 4 366 98 30; Fax: +32 4 366 33

20   64.

21   Keywords: Common scab disease; Thaxtomin;  $\beta$ -glucosidase; cello-oligosaccharides; CebR.

## 22 **Abstract**

23 Common scab disease on root and tuber plants is caused by *Streptomyces scabies* and related  
24 species which use the cellulose synthase inhibitor thaxtomin A as main phytotoxin.  
25 Thaxtomin production is primarily triggered by the import of cello-oligosaccharides. Once  
26 inside the cell, the fate of the cello-oligosaccharides is dichotomized into i) fueling glycolysis  
27 with glucose for the saprophytic lifestyle through the action of  $\beta$ -glucosidase(s) (BG), and ii)  
28 eliciting the pathogenic lifestyle by inhibiting the CebR-mediated transcriptional repression of  
29 thaxtomin biosynthetic genes. Here we investigated the role of *scab57721* encoding a putative  
30 BG (BglC) in the onset of the pathogenicity of *S. scabies*. Enzymatic assays showed that BglC  
31 was able to release glucose from cellobiose, cellotriose and all other cello-oligosaccharides  
32 tested. Its inactivation resulted in a phenotype opposite to what was expected as we monitored  
33 reduced production of thaxtomin when the mutant was cultivated on media containing cello-  
34 oligosaccharides as unique carbon source. This unexpected phenotype could be attributed to  
35 the highly increased activity of alternative intracellular BGs, probably as a compensation of  
36 *bglC* inactivation, which then prevented cellobiose and cellotriose accumulation to reduce the  
37 activity of CebR. In contrast, when the *bglC* null mutant was cultivated on media devoid of  
38 cello-oligosaccharides it instead constitutively produced thaxtomin. This observed  
39 hypervirulent phenotype does not fit with the proposed model of the cello-oligosaccharide-  
40 mediated induction of thaxtomin production and suggests that the role of BglC in the route to  
41 the pathogenic lifestyle of *S. scabies* is more complex than currently presented.

## 42 **Introduction**

43 *Streptomyces scabies* is the causative agent of common scab on tuber and root plants via the  
44 production of the phytotoxin thaxtomin A amongst other virulence factors (Bignell *et al.*,  
45 2010; Lerat *et al.*, 2009; Loria *et al.*, 2008). The onset of thaxtomin A is triggered upon  
46 transport of the cello-oligosaccharides cellobiose [(Glc)<sub>2</sub>] and cellotriose [(Glc)<sub>3</sub>] which  
47 involves the ATP-binding cassette (ABC) transporter system CebEFG-MsiK (Jourdan *et al.*,  
48 2016). Once inside the cell, mainly cellobiose (Glc)<sub>2</sub> but also cellotriose (Glc)<sub>3</sub> can interact  
49 with the cellulose utilization repressor CebR preventing it from binding to its operator  
50 sequences associated with the thaxtomin biosynthetic gene cluster and therefore allowing the  
51 production of the phytotoxin (Francis *et al.*, 2015). Adjacent to the *cebR-cebEFG* divergon  
52 and 146 nucleotides downstream of *cebG*, *scab57721 (bglC)* encodes a putative β-glucosidase  
53 (BG) of the glycosyl hydrolases (GH) GH1 family which is expected to catalyze the  
54 hydrolysis of terminal, non-reducing β-D-glucosyl residues, with release of β-D-glucose from  
55 β-D-glucosides and oligosaccharides (Henrissat, 1991; ENZYME entry: EC 3.2.1.21). The  
56 presence of a gene coding for an intracellular GH within the cluster of a sugar ABC-  
57 transporter is a common feature which allows co-transcription of genes required for  
58 carbohydrate import and their subsequent enzymatic degradation in the cytoplasm. Using  
59 molecules that are also common - most likely the most recurrent - soil carbohydrate nutrients  
60 for the onset of pathogenicity is very intriguing (Jourdan *et al.*, 2017). In non-pathogenic  
61 *Streptomyces*, coordinated expression of genes for BG and cello-oligosaccharide transport is  
62 appropriate for feeding the glycolysis pathway with glucose (Fig. 1). However, as stated  
63 earlier, in the plant pathogen *S. scabies*, (Glc)<sub>2</sub> and (Glc)<sub>3</sub> are not only perceived as nutrients  
64 used in the course of saprophytic behavior, but are above all signaling molecules eliciting its  
65 pathogenic lifestyle (Johnson *et al.*, 2007; Jourdan *et al.*, 2016; Wach *et al.*, 2007). Enzymes

66 with a BG activity could thus potentially play an important role in controlling the onset of the  
67 virulence of *S. scabies* by limiting the intracellular accumulation of signals triggering  
68 thaxtomin A biosynthesis (Fig. 1). As a consequence, intracellular BG(s) of *S. scabies* might  
69 have evolved to display specific/unique properties which would ensure the microorganism to  
70 adopt the proper behavior – saprophytic versus pathogenic – according to environmental  
71 conditions (Fig. 1). In this work we defined the enzymatic properties, assessed the expression  
72 control mechanism, and investigated the role of *scab57721* (*bglC*) in thaxtomin A production  
73 and therefore in the onset of the virulence of *S. scabies*.

74

## 75 **Results and Discussion**

### 76 **Enzymatic properties of BglC of *S. scabies***

77 The gene *scab57721* encodes a 480 amino acid peptide orthologous to the well-characterized  
78 intracellular GH1 family BG BglC of *Thermobifida fusca* (53 and 67 % of amino acid identity  
79 and similarity, respectively) which also lies downstream of the *cebEFG* operon (Spiridonov  
80 and Wilson, 2001). BglC of *S. scabies* contains the MYVTENGAA sequence (amino acids  
81 376 to 384) which matches the GH1 family active site signature [LIVMFSTC]-[LIVFYS]-  
82 [LIV]-[LIVMST]-E-N-G-[LIVMFAR]-[CSAGN] (PROSITE accession number PS00572). In  
83 order to assess the substrate specificity and the enzymatic properties of the predicted  
84 intracellular BG, *scab57721* (*bglC*) was cloned into pET-28a (Table 1) for heterologous  
85 expression in *Escherichia coli* with a six histidine-tag fused to the N-terminus part of the  
86 protein (6His-BglC). Purification through Ni-NTA affinity chromatography enabled the  
87 recovery of 6His-BglC with an apparent molecular weight (MW) of ~54 kDa which  
88 corresponds well to the its calculated MW of 54.121 kDa (Fig. 2A).

89 The kinetic parameters of 6His-BglC were determined by measuring the initial rate of  
90 cellobiose hydrolysis (glucose release) at various concentrations of cellobiose. The maximum

91 rate of the reaction ( $V_{max}$ ) is  $7.3 \mu\text{mol min}^{-1} \text{mg}^{-1}$ . The  $K_m$  and  $k_{cat}$  values were 0.77 mM and  
92  $400 \text{ min}^{-1}$ , respectively (Fig. 2B). The activity of 6His-BglC at different temperatures (from  
93 20 to  $55^\circ\text{C}$ ) and pH (from 5 to 10) values was measured using *p*-nitrophenyl- $\beta$ -D-  
94 glucopyranoside (*p*-NP $\beta$ G) as substrate (mimicking cellobiose). The activity of the enzyme  
95 gradually increased from 20 to  $30^\circ\text{C}$ , remained constant up to  $37^\circ\text{C}$ , and declined abruptly to  
96 10% of the maximal activity at  $42^\circ\text{C}$  (Fig. S1). The optimal pH of BglC is around 7.5 as the  
97 enzyme maintained high activity between pH 6.5 and 8.5, and declined rapidly to 30 and 50%  
98 of its optimum at pH 5.5 and 9, respectively (Fig. S1).

99 To determine the substrate specificity of BglC, the recombinant protein was incubated with  
100 cellobiose ( $\text{Glc}$ )<sub>2</sub>, various cello-oligosaccharides ranging from cellotriose ( $\text{Glc}$ )<sub>3</sub> to  
101 cellohexaose ( $\text{Glc}$ )<sub>6</sub>, as well as with different disaccharides unrelated to cellulose degradation  
102 (lactose, saccharose, maltose, threhalose, and turanose). Samples collected after increasing  
103 incubation times were spotted on a thin layer chromatography plate and revealed that 6His-  
104 BglC was able to generate glucose from cellobiose and all other cello-oligosaccharides tested  
105 (Fig. 2C). 6His-BglC was not able to release glucose from disaccharides unrelated to cellulose  
106 except for lactose though with much lower efficiency compared to cellobiose or any of the  
107 other cello-oligosaccharides (data not shown). If BglC displayed activity *in vitro* against  
108 ( $\text{Glc}$ )<sub>4</sub>, it is unlikely to occur inside the cytoplasm as the extracellular ABC transporter  
109 component CebE of *S. scabies* only displayed a high binding affinity to ( $\text{Glc}$ )<sub>2</sub> and ( $\text{Glc}$ )<sub>3</sub>  
110 (Jourdan *et al.*, 2016).

111

### 112 ***bglC* expression is repressed by CebR and induced by cellobiose**

113 In order to ascertain that BglC is indeed involved in the catabolism of ( $\text{Glc}$ )<sub>2</sub> and ( $\text{Glc}$ )<sub>3</sub> *in*  
114 *vivo*, we assessed if its expression/production in *S. scabies* is under the control of the cellulose  
115 utilization repressor CebR. Quantitative reverse transcription PCR (qPCR) was performed on

116 RNA extracted from the wild-type strain of *S. scabies*, 87-22, and its *cebR* deletion mutant,  
117  $\Delta cebR$ , grown on ISP-4. This revealed that the deletion of *cebR* resulted in an 85-fold (wild-  
118 type 0.025 vs. *cebR* mutant 2.13) overexpression of *bglC* (Fig. 3A). In addition, targeted LC-  
119 MRM analysis allowed evaluation of the effect of the deletion of *cebR* as well as the presence  
120 of cellobiose on BglC production in *S. scabies*. Quantitative analyses of two specific tryptic  
121 peptides of BglC (LVDELLAK and TDPVASLR) showed that the protein was more abundant  
122 in the total intracellular protein extracts of the  $\Delta cebR$  mutant (2.3 fold more compared to 87-  
123 22) as well as in extracts of the *S. scabies* wild-type strain grown in cellobiose-containing  
124 media (2.9 fold more compared to the condition without cellobiose) (Fig. 3B). The observed  
125 transcriptional repression exerted by CebR and the cellobiose-dependent induction of  
126 *bglC*/BglC are mediated through direct binding of CebR to the CebR-binding site  
127 (TGGaAGCGCTCCCA) identified at position -14 nt upstream of *bglC* (Fig. 3C). The results  
128 deduced from the targeted proteomic approach are in agreement with the early and  
129 constitutive overall intracellular BG activity measured as a consequence of *cebR* deletion  
130 while *S. scabies* 87-22 wild-type only displayed measurable BG activity when grown in the  
131 presence of cellobiose (Fig. 3D).

132

### 133 **Inactivation of *bglC* results in reduced thaxtomin A production when *S. scabies* is grown** 134 **with cello-oligosaccharides as the sole carbon source**

135 Since we demonstrated that *bglC*/BglC i) is induced by cello-oligosaccharides, and ii)  
136 displays BG activity against (Glc)<sub>2</sub> and (Glc)<sub>3</sub>, we finally assessed if the catabolic activity of  
137 BglC influenced the production levels of thaxtomin A and as a consequence virulence of *S.*  
138 *scabies*. We generated a *bglC* null-mutant ( $\Delta bglC$ ) by replacing *orf scab57721* by the  
139 apramycin resistance cassette as performed previously for *cebR*, *cebE* and *msiK* (Francis *et*  
140 *al.*, 2015; Jourdan *et al.*, 2016). Semi-quantitative analysis by HPLC revealed that the

141  $\Delta bglC/\Delta 57721$  mutant under-produced thaxtomin A to only 37% and 9% of the thaxtomin  
142 levels produced by the wild-type strain when cultivated in liquid minimal medium (MM) with  
143 cellobiose or cellotriose as sole carbon sources (Fig. 4A). This result was unexpected as the  
144 deletion of *bglC* should normally lower the catabolism of cello-oligosaccharides for  
145 glycolysis and therefore would result in their higher intracellular accumulation as allosteric  
146 inhibitors of CebR and activators of *txtR* expression.

147 To tentatively explain the reduced thaxtomin A production as a result of the inactivation of  
148 *bglC*, we monitored cellobiose or cellotriose consumption as well as the total BG activity of  
149 the  $\Delta bglC$  strain. For this purpose, *S. scabies* wild-type 87-22 and its *bglC* null mutant were  
150 grown for 24 hours in MM supplemented with either 500  $\mu$ M of (Glc)<sub>2</sub> or (Glc)<sub>3</sub> as the sole  
151 carbon source. The concentration of cello-oligosaccharides remaining in the culture  
152 supernatant was measured by HPLC at 1.5 hour intervals post inoculation (hpi) (Fig. 5A). Full  
153 consumption of cellobiose and cellotriose by the wild-type strain 87-22 was accomplished at 3  
154 and 4.5 hpi, respectively, while the *bglC* mutant was impaired in both cellobiose and  
155 cellotriose utilization as total consumption of these cello-oligosaccharides required about 3 h  
156 longer than for the wild-type (Fig. 5A). This delayed import and consumption could possibly  
157 postpone the production of thaxtomin A in the *bglC* mutant but should not be responsible for  
158 the observed massive reduction of production of the phytotoxin.

159 Concomitantly to the measurements of the cello-oligosaccharide consumption, we assessed  
160 the intracellular and extracellular relative BG activity to evaluate to which extent the loss of  
161 *bglC* impacted the overall BG activity (Figs. 5BC and S2). Each soluble fraction (intra- and  
162 extracellular) was assessed at five different time points in both wild-type and  $\Delta bglC$  strains  
163 using *p*-nitrophenyl- $\beta$ -D-glucopyranoside (*p*-NP $\beta$ G) as substrate. Very low extracellular BG  
164 activities were obtained for both strains and under both MM with cellobiose or cellotriose  
165 culture conditions (Fig. S2). Assessment of the intracellular BG activity against *p*-NP $\beta$ G

166 revealed that while the activities measured in *S. scabies* wild-type and  $\Delta bglC$  were similar in  
167 the cellobiose-containing medium at the beginning of the culture, the activity of the mutant  
168 strain increased dramatically after 3 hpi (Fig. 5B). At the end of the experiment, the wild-type  
169 strain presented only a slight increase in BG activity reaching merely one third of the overall  
170 BG activity displayed by the *bglC* null mutant (Fig. 5B). The corresponding activities  
171 measured in cellotriose-containing medium were more similar for both strains at the  
172 beginning of the culture but the *bglC* null mutant presented a BG activity that was about 4  
173 times higher than that of the WT at 24 hpi (Fig. 5C). This delay in the response of the BG  
174 might be a consequence of the delay in cellotriose consumption observed for the  $\Delta bglC$  strain  
175 (Fig. 5A) but also because cellotriose is a much weaker allosteric effector of CebR compared  
176 to cellobiose (Francis *et al.*, 2015). These observations demonstrate that BglC is not the only  
177 functional  $\beta$ -glucosidase in *S. scabies* to catabolize cello-oligosaccharides. The fact that the  
178 mutant displayed BG activity points to the presence of one or several additional/alternative  $\beta$ -  
179 glucosidases which are apparently overproduced or for which the biosynthesis is awakened  
180 when cellobiose or cellotriose was provided as the sole carbon source. The nature and the  
181 pathway associated with the induction of the alternative  $\beta$ -glucosidase(s) are currently  
182 unknown but might involve CebR as the response differed according to cellobiose or  
183 cellotriose supply. The contribution of BglC to the overall BG activity of the wild-type is  
184 another pending question.

185 That the *bglC* null mutant displayed a much higher overall BG activity would result in a more  
186 rapid depletion of the incorporated thaxtomin-inducing cello-oligosaccharides, thus providing  
187 a possible explanation of the unexpected decreased thaxtomin A production of *S. scabies*  
188  $\Delta bglC$  compared to the wild-type when cello-oligosaccharides are provided as the only carbon  
189 source. Similar reduced thaxtomin A production levels were also observed when assays were  
190 performed on solid MM. When inoculated on MM with cellobiose as sole carbon source



191 (TDMc, Fig. 6), the  $\Delta bglC$  mutant displayed a growth delay during the first 24h consistent  
192 with the absence of a major cellobiose hydrolyzing enzyme. When incubated for a longer  
193 period, growth is recovered but the  $\Delta bglC$  strain cannot reach the level of thaxtomin produced  
194 by the wild-type in TDMc as previously described in liquid minimal medium (Fig. 4A).

195

196 **Inactivation of *bglC* results in overproduction or constitutive production of thaxtomin A**  
197 **when cell-oligosaccharides are not the only carbon source**

198 The capability of the mutant to produce thaxtomin A was also monitored on a series of solid  
199 media amongst which the complex OBA medium that naturally contains cello-  
200 oligosaccharides and other carbon sources (Johnson *et al.*, 2007; Fig. 6). When grown on  
201 OBA the  $\Delta bglC$  mutant overproduced thaxtomin A compared to the wild-type strain (Fig.  
202 6B). On this medium, the addition of cellobiose to the OBA medium neither decreased nor  
203 further increased thaxtomin production suggesting that the *bglC* mutant could have partially  
204 lost its capacity to respond to cellobiose when other carbon sources are available (Fig. 6B).  
205 Surprisingly, the *bglC* mutant also overproduced thaxtomin A when inoculated on ISP4  
206 medium deprived of cello-oligosaccharides as nutrient sources (Fig. 6). In order to ascertain  
207 the validity of this unexpected phenotype, the mutant was complemented by introducing  
208 plasmid pIMF001 (Table 1) containing the *bglC* gene with its promoter into the  $\Delta bglC$  mutant  
209 isolates. Complementation of  $\Delta bglC$  restored the wild-type phenotype when bacteria were  
210 streaked out on ISP-4 (Fig. S3) demonstrating that the observed alteration in thaxtomin  
211 production was indeed caused by the deletion of the *bglC* (*scab\_57721*) gene and not due to a  
212 possible unspecific event such as a spontaneous mutation. The thaxtomin A overproduction  
213 phenotype was further confirmed on most media tested, so regardless of the presence of  
214 cellobiose or other cello-oligosaccharides (Figure 6).

215 Since  $\Delta bglC$  showed constitutive production of thaxtomin A, its virulence capacity was  
216 evaluated on *Arabidopsis thaliana* and radish seedlings. No different outcome was observed  
217 between radish seedlings infected with the wild-type or the mutant (Fig. 7A). However, since  
218 the outcome of the radish assay is mostly influenced by the effect of thaxtomin on the plant's  
219 growth and development and thaxtomin is active in nanomolar concentrations (King *et al.*,  
220 2001), it is hard to see any difference between the production levels of the wild-type and a  
221 potential thaxtomin overproducer using radish as host. Assays were also performed using  
222 slightly older seedlings (48h instead of 30h after sowing) or a lower inoculum (200  $\mu$ l of a  
223 mycelial stock of OD<sub>600</sub> 0.1 instead of OD<sub>600</sub> 1.0), still no difference could be observed. Yet,  
224 when thaxtomin was extracted from the agar-water support with the radish seedlings, a  
225 significantly higher concentration of thaxtomin A was measured for the assays done with the  
226  $\Delta bglC$  isolates compared to the wild-type strain (Fig. S4). The use of *A. thaliana* (ecotype  
227 Col-0) as the plant model revealed to be more suitable for monitoring hypervirulent  
228 phenotypes than radish seedlings as previously observed for the *cebR* mutant which also  
229 overproduces thaxtomin A (Francis *et al.*, 2015). *A. thaliana* seeds grown on Murashige-  
230 Skoog (MS) agar were inoculated with spores of *S. scabies* 87-22 (wild-type) and its  $\Delta bglC$   
231 mutant. After 7 days of growth, seedlings inoculated with the *bglC* mutant presented stronger  
232 growth and developmental defects compared to those inoculated with the wild-type strain  
233 (Fig. 7B). Closer inspection of individual plants revealed stronger root and shoot stunting as a  
234 consequence of the *bglC* deletion (Fig. 7B).

235

## 236 **Conclusion and perspectives**

237 In this work we demonstrated that the protein encoded by the gene *scab57721* located  
238 downstream of the *cebEFG* operon is a  $\beta$ -glucosidase active against different cello-  
239 oligosaccharides including the best inducers of thaxtomin A production *i.e.*, cellobiose and

240 cellotriose. Expression of *bglC* is also repressed by CebR, the master regulator of  
241 pathogenicity in *S. scabies*, and induced by cellobiose. Since cellobiose and cellotriose  
242 consumption by *S. scabies* correlates with an intracellular increase of  $\beta$ -glucosidase activity,  
243 we assumed that BglC (and any other enzyme with BG activity) would play an essential role  
244 in controlling the pool of imported elicitors to trigger the CebR regulon and therefore  
245 thaxtomin production as proposed in the model illustrated in Fig. 1. In line with the current  
246 model of the cello-oligosaccharide-mediated induction of thaxtomin A production we were  
247 expecting that the inactivation of *bglC* would simply result in an increased or prolonged  
248 production of thaxtomin under culture conditions supplemented with cellobiose or cellotriose  
249 as these CebR-allosteric molecules would remain longer in the cytoplasm. However,  
250 surprisingly, we observed that the presence of cellobiose and cellotriose as sole carbon source  
251 instead reduced the production levels of thaxtomin A, probably as a consequence of the  
252 awakening of alternative BG(s) encoded in the genome of *S. scabies* as compensation for the  
253 loss of BglC. Identification of the protein(s) responsible for the high BG activity in the *bglC*  
254 mutant is currently under investigation.

255 Finally, the most striking phenotype observed for the  $\Delta bglC$  strain was the loss of the  
256 cellobiose-dependent induction of thaxtomin and thus the constitutive thaxtomin production  
257 in complex media devoid of eliciting cellulose-related sugars (Fig. 6). That this mutant is able  
258 to produce thaxtomin without the presence of the inducing molecules is difficult to explain  
259 based on the current model of the induction pathway of thaxtomin production and suggests  
260 that the role of BglC in the induction of *S. scabies* pathogenicity involves mechanisms that  
261 still have to be uncovered.

## 262 **Experimental procedures**

### 263 **Bacterial strains and culture conditions**

264 *Escherichia coli* strains [DH5 $\alpha$  and Rosetta<sup>TM</sup> (DE3)] were cultured in Luria-Bertani (LB)  
265 medium at 37°C. *Streptomyces* strains (wild-type 87-22 and mutant strains  $\Delta$ 57721/ $\Delta$ bglC)  
266 were routinely grown at 28°C in tryptic soy broth (TSB; BD Biosciences) or on International  
267 *Streptomyces* Project medium 4 (ISP-4, BD Biosciences). When required, the medium was  
268 supplemented with the antibiotics apramycin (100  $\mu$ g/ml), kanamycin (50  $\mu$ g/ml),  
269 chloramphenicol (25  $\mu$ g/ml), thiostrepton (25  $\mu$ g/ml), and/or nalidixic acid (50  $\mu$ g/ml).  
270 Cellobiose and cello-oligosaccharides were purchased from Megazyme (Ireland). For the BG  
271 activity assays and the thaxtomin production assays the *Streptomyces* strains were grown on  
272 the complex media Oat Bran Agar (OBA; Johnson *et al.*, 2007), Soy Flour Mannitol (SFM;  
273 (Kieser *et al.*, 2000), Potato Mash Agar (PMA; 12.5 g potato flakes and 5 g agar per liter), as  
274 well as the minimal medium Thaxtomin Defined Medium (TDM), modified from Johnson *et*  
275 *al.* (2007) by omitting xylose and using a final concentration of 1% of the carbon source of  
276 choice.

277

### 278 **Heterologous expression and purification of His-tagged BglC**

279 The open reading frame encoding SCAB57721 (BglC) was amplified by PCR using the  
280 primers scab\_57721\_+3\_NdeI and scab\_57721\_+1458\_HindIII (see Table 1 for primer  
281 sequences). The PCR product was subsequently cloned into the pJET1.2/blunt cloning vector,  
282 yielding pSAJ021. After DNA sequencing to verify the correct amplification of *scab57721*,  
283 an *NdeI-HindIII* DNA fragment was excised from pSAJ021 and cloned into pET-28a digested  
284 with the same restriction enzymes leading to pSAJ022. *E. coli* Rosetta<sup>TM</sup> (DE3) cells carrying  
285 pSAJ022 were grown at 37°C in 250 ml LB medium containing 50  $\mu$ g/ml of kanamycin until  
286 the culture reached an absorbance at 600 nm ( $A_{600}$ ) of 0.6. Production of 6His-tagged BglC

287 (6His-BglC) was induced overnight (~20 h) at 16°C by addition of 1 mM isopropyl-β-D-  
288 thiogalactopyranoside (IPTG). Cells were collected by centrifugation and ruptured by  
289 sonication in lysis buffer (100 mM Tris-HCl buffer; pH 7.5; NaCl 250 mM; 20 mM  
290 imidazole) supplemented with the EDTA-free cOmplete protease inhibitor cocktail (Roche).  
291 Soluble proteins were loaded onto a pre-equilibrated Ni<sup>2+</sup>-nitrilotriacetic acid (NTA)-agarose  
292 column (5-ml bed volume), and 6His-BglC was eluted within the range of 100 to 150 mM  
293 imidazole. Fractions containing the pure protein were pooled (Fig. 2A) and dialyzed overnight  
294 in 50 mM HEPES; pH 7.5.

295

### 296 **Construction of the *bglC* mutant in *S. scabies* 87-22 and its genetic complementation**

297 The deletion of the *bglC* coding region was created as described previously (Francis *et al.*,  
298 2015; Jourdan *et al.*, 2016). Specific primers used to generate and verify the gene deletion and  
299 complement the *bglC* null-mutant are listed in Table 1. A fragment containing the *bglC*  
300 coding region and the upstream region (379 bp) harboring the promoter was generated by  
301 PCR using primers with engineered *Xba*I sites (Table 1) and cloned into pCR<sup>TM</sup>-BluntII-  
302 TOPO (Invitrogen). After sequence confirmation, fragments were retrieved through an *Xba*I  
303 restriction digest, gel purified, and cloned into an *Xba*I-linearized pAU3-45 (Bignell *et al.*,  
304 2005) resulting in plasmid pIMF001 (Table 1). Complementation constructs, as well as the  
305 empty pAU3-45 plasmid, were introduced into three *bglC* mutant isolates through  
306 intergeneric conjugation similar to the gene deletion process as described previously (Francis  
307 *et al.*, 2015; Jourdan *et al.*, 2016).

308

### 309 **Quantitative Reverse Transcription PCR**

310 RNA was prepared from 72-h-old mycelia grown on ISP-4 plates at 28°C using the RNeasy  
311 minikit (Qiagen) according to the manufacturer's instructions. Verification of the absence of

312 contaminating genomic DNA, cDNA synthesis, and quantitative reverse transcription PCR  
313 (qPCR) were performed as described previously (Francis et al. 2015; Jourdan et al. 2016). The  
314 *bglC* specific internal primers imf302 and imf303 were used to quantify the expression levels  
315 of the *bglC* gene (Table 1). The *murX*, *hrdB*, and *gyrA* genes were used to normalize the  
316 amount of RNA in the samples (Joshi *et al.*, 2007). Each measurement was performed in  
317 triplicate with three different *cebR* mutant isolates.

318

### 319 **Targeted proteomics**

320 *S. scabies* 87-22 and its *cebR* null mutant were grown on ISP-4 plates with or without a 0.7%  
321 cellobiose supply. The mycelium was collected after 48 hours of incubation at 28°C, and  
322 resuspended in 50 mM NH<sub>4</sub>HCO<sub>3</sub> buffer (pH 7.5). Crude intracellular extracts were obtained  
323 after sonication of the mycelium as described previously (Jourdan *et al.*, 2016). Sample  
324 preparation for Liquid Chromatography-Multiple Reaction Monitoring (LC-MRM) analysis,  
325 and LC-MRM analysis were performed as previously described (Jourdan *et al.*, 2016).

326

### 327 **β-glucosidase activity assays**

328 The relative enzyme activity was determined using *p*-nitrophenyl-β-D-glucopyranoside (*p*-  
329 NPβG) as substrate. The reaction mixture (200 μl) containing 50 mM HEPES buffer (pH 7.5),  
330 0.2 μM of purified 6His-BglC and the tested reagent was incubated for 10 min at 25°C before  
331 addition of 1 mM *p*-NPβG. The reaction was carried out at 25°C for 2 min and stopped by  
332 addition of 100 μl of 2 M Na<sub>2</sub>CO<sub>3</sub>. All assays were performed under these conditions, unless  
333 otherwise indicated. The release of *p*-nitrophenol (*p*-NP) was measured at 405 nm with a  
334 TECAN infinite<sup>®</sup> 200 PRO.

335

### 336 **Kinetic analysis**

337 Kinetic parameters of BglC ( $K_m$  and  $k_{cat}$ ) were determined by measuring the glucose released  
338 at various cellobiose concentrations in 50 mM HEPES buffer pH 7.5 at 26°C. A reaction time  
339 of 7 min was chosen to ensure initial rates of hydrolysis. The glucose released was determined  
340 using the D-Glucose HK Assay Kit from Megazyme (Ireland). Data were fitted to the Henri-  
341 Michaelis-Menten equation using the GraphPad Prism 5 software.

342

### 343 **Hydrolysis of disaccharides and oligosaccharides**

344 The cleavage ability of BglC was tested against different cello-oligosaccharides (cellobiose,  
345 cellotriose, and cellotetraose, (Megazyme; Ireland) or different disaccharides (lactose,  
346 saccharose, maltose, threhalose and turanose). Reaction mixtures (100  $\mu$ l) containing 50 mM  
347 HEPES buffer pH 7.5; 0.4  $\mu$ M of purified 6His-BglC; 6.25 mM of cello-oligosaccharides or  
348 12.5 mM of disaccharides were incubated at 30°C. Samples of each 15  $\mu$ l were collected at 0,  
349 15, 30 and 60 min, and heated at 98°C for 5 min to stop the reaction. Each sample was spotted  
350 onto an aluminum-backed Silica gel plate (Sigma). The plates were run with chloroform-  
351 methanol-acetic acid-water solvent (50:50:15:5, vol/vol), air dried, dipped in 5% H<sub>2</sub>SO<sub>4</sub> in  
352 ethanol and heated over a hot plate until visualization of the carbohydrate spots as described  
353 by Gao and Wakarchuk (2014).

354

### 355 **Monitoring of cellobiose and cellotriose consumption and glucose production**

356 Glucose, cellobiose, and cellotriose consumption measurements were performed by HPLC  
357 (Alliance, Waters Milford, MA, USA) on a lead-form Aminex HPX-87P Column (300 x 7.8  
358 mm, 9 $\mu$ m particle size supplied by Bio-Rad) in combination with two Micro-Guard columns  
359 (De-Ashing refill cartridge 30 x 4.6 mm supplied by Bio-Rad) heated to 80°C with Milli-Q  
360 (18.2 M $\Omega$  cm) distilled-deionized H<sub>2</sub>O in an isocratic mode (flow rate 0.6 ml/min). Peaks

361 were detected by a refractive index detector (Waters 2414) and processed with the Empower 3  
362 software (Waters Milford, MA, USA).

363

### 364 **Thaxtomin production assays**

365 Thaxtomin production assays were performed as described previously (Francis *et al.*, 2015;  
366 Jourdan *et al.*, 2016). Briefly, plates were inoculated with equal amounts of mycelial  
367 suspensions of the *S. scabies* 87-22 wild-type and its *bglC* null mutant, and incubated 7 days  
368 at 28°C. Thaxtomin was extracted from the agar and quantification by reversed-phase high-  
369 performance liquid chromatography (HPLC) was performed as described previously (Francis  
370 *et al.*, 2015; Jourdan *et al.*, 2016). For liquid cultures, thaxtomin was extracted from 1 ml of  
371 the culture supernatant with 0.3 ml of ethyl acetate and quantified by HPLC using a  
372 NUCLEODUR® 100-5 C18ec column (Macherey-Nagel). Samples were eluted at a flow rate  
373 of 0.8 ml/min, and A400 was monitored using a Multi  $\lambda$  Fluorescence detector (2475,  
374 Waters). All experiments were repeated using three different biological and technological  
375 replicates per *S. scabies* strains.

376

### 377 **Virulence assays**

378 Virulence assays on *Arabidopsis* seedlings were performed as follows. Seeds of Col-O  
379 ecotype were surface sterilized for 15 min in bleach solution (40% vol/vol bleach, 0.05%  
380 vol/vol Tween20), thoroughly rinsed with sterile H<sub>2</sub>O, and stratified 3 days at 4°C in the dark  
381 before sowing. 300 to 400 *Arabidopsis* seeds were sown in each well of a six-well plate  
382 containing half concentrated MS medium (Sigma M5513) supplemented with 1% sucrose.  
383 Each well was inoculated with 250  $\mu$ l spore suspensions of the *S. scabies* 87-22 wild-type and  
384 *bglC* mutant ( $5.10^4$  spores per  $\mu$ l), or sterile water as the control. The plates were incubated at  
385  $25 \pm 0.5^\circ\text{C}$  under 16-h photoperiod for 7 days.



386 Virulence phenotypes on radish seedlings were performed as described previously (Jourdan *et*  
387 *al.*, 2016). Thaxtomin was extracted from the total of the radish seedlings and the water-agar  
388 medium by cutting the material into small pieces and soaking in 15 ml methanol for 10 min.  
389 The liquid phase was dried down and resuspended in 1 ml methanol. These samples were  
390 analyzed by HPLC as described above.

391

## 392 **Acknowledgments**

393 S.J. and Be. D's work was supported by Aspirant grants from the FNRS. S.R. is an FRS-  
394 FNRS research associate. This work is supported in part by the Belgian program of  
395 Interuniversity Attraction Poles initiated by the Federal Office for Scientific Technical and  
396 Cultural Affairs (PAI no. P7/44) to Ba.D. and S.R., and by the FNRS (research project  
397 T.0006.14-PDR [FRFC]) to S.R. I.M.F. was supported by the Agriculture and Food Research  
398 Initiative Competitive Grants Program (grant 2010-65110-20416 from the U.S. Department of  
399 Agriculture's National Institute of Food and Agriculture to R. L.). Ba.D. is also supported by  
400 a BOF-basic equipment and a GOA grant from the Ghent University special research funds.  
401 The authors declare that there is no conflict of interest regarding the publication of this article.

## 402 **References**

- 403 **Bignell, D.R.D., Tahlan, K., Colvin, K.R., Jensen, S.E. and Leskiw, B.K.** (2005)  
404 Expression of *ccaR*, encoding the positive activator of cephamycin C and clavulanic acid  
405 production in *Streptomyces clavuligerus*, is dependent on *bldG*. *Antimicrob. Agents Ch.*,  
406 **49**, 1529-1541.
- 407 **Bignell, D.R.D., Huguet-Tapia, J., Joshi, M.V., Pettis, G.S. and Loria, R.** (2010) What  
408 does it take to be a plant pathogen: genomic insights from *Streptomyces* species. *Anton.*  
409 *Leeuw. Int. J. G.*, **98**,179–194.
- 410 **Francis, I.M., Jourdan, S., Fanara, S., Loria, R. and Rigali, S.** (2015) The cellobiose  
411 sensor CebR is the gatekeeper of *Streptomyces scabies* pathogenicity. *mBio*, **6**, e02018-  
412 14.
- 413 **Gao, J. and Wakarchuk, W.** (2014) Characterization of five  $\beta$ -glycoside hydrolases from  
414 *Cellulomonas fimi* ATCC 484. *J. Bacteriol.*, **196**, 4103-4110.
- 415 **Gust, B., Challis, G.L., Fowler, K., Kieser, T. and Chater, K.F.** (2003) PCR-targeted  
416 *Streptomyces* gene replacement identifies a protein domain needed for biosynthesis of  
417 the sesquiterpene soil odor geosmin. *Proc. Natl. Acad. Sci. USA*, **100**, 1541-1546.
- 418 **Henrissat, B.** (1991) A classification of glycosyl hydrolases based on amino acid sequence  
419 similarities. *Biochem. J.*, **280**, 309-316.
- 420 **Johnson, E.G., Joshi, M.V., Gibson, D.M. and Loria, R.** (2007) Cello-oligosaccharides  
421 released from host plants induce pathogenicity in scab-causing *Streptomyces* species.  
422 *Physiol. Mol. Plant Pathol.*, **71**, 18-25.
- 423 **Joshi, M. V., Bignell, D.R.D., Johnson, E.G., Sparks, J.P., Gibson, D.M. and Loria, R.**  
424 (2007) The AraC/XylS regulator TxtR modulates thaxtomin biosynthesis and virulence  
425 in *Streptomyces scabies*. *Mol. Microbiol.*, **66**, 633-642.
- 426 **Jourdan, S., Francis, I.M., Kim, M.J., Salazar, J.J.C., Planckaert, S., Frère, J.M.,**

- 427 **Matagne, A., Kerff, F., Devreese, B., Loria, R. and Rigali, S.** (2016) The CebE/MsiK  
428 Transporter is a doorway to the cello-oligosaccharide-mediated induction of  
429 *Streptomyces scabies* pathogenicity. *Sci. Rep.*, **6**, 27144.
- 430 **Jourdan, S., Francis, I.M., Deflandre, B., Loria, R. and Rigali, S.** (2017) Tracking the  
431 subtle mutations driving host sensing by the plant pathogen *Streptomyces scabies*.  
432 *mSphere*, **2**, e00367-16.
- 433 **Kieser, T., Bibb, M.J., Buttner, M.J., Chater, K.F. and Hopwood, D.A.** (2000). Practical  
434 *Streptomyces* Genetics. Norwich, UK: The John Innes Foundation.
- 435 **King, R.R., Lawrence, H.C. and Gray, J.A.** (2001) Herbicidal properties of the thaxtomin  
436 group of phytotoxins. *J. Agr. Food Chem.*, **49**, 2298-2301.
- 437 **Lerat, S., Simao-Beauvoir, A.M. and Beaulieu, C.** (2009) Genetic and physiological  
438 determinants of *Streptomyces scabies* pathogenicity. *Mol. Plant Pathol.*, **10**, 579-585.
- 439 **Loria, R., Bignell, D.R.D., Moll, S., Huguet-Tapia, J., Joshi, M.V., Johnson, E.G.,  
440 Seipke, R.F. and Gibson, D.M.** (2008) Thaxtomin biosynthesis: the path to plant  
441 pathogenicity in the genus *Streptomyces*. *Anton. Leeuw. Int. J. G.*, **94**, 3-10.
- 442 **Spiridonov, N.A. and Wilson, D.B.** (2001) Cloning and biochemical characterization of  
443 BglC, a beta-glucosidase from the cellulolytic actinomycete *Thermobifida fusca*. *Curr.*  
444 *Microbiol.*, **42**, 295-301.
- 445 **Tenconi, E., Urem, M., Świątek-Połatyńska, M.A., Titgemeyer, F., Muller, Y.A., van  
446 Wezel, G.P. and Rigali, S.** (2015) Multiple allosteric effectors control the affinity of  
447 DasR for its target sites. *Biochem. Bioph. Res. Co.*, **464**, 324-329.
- 448 **Wach, M.J., Krasnoff, S.B., Loria, R. and Gibson, D.M.** (2007) Effect of carbohydrates on  
449 the production of thaxtomin A by *Streptomyces acidiscabies*. *Arch. Microbiol.*, **188**, 81-  
450 88.
- 451

452 **Table 1. Primers and plasmids used and generated in this study**

| Primers                  | Sequences (5'-3') *                                                                                                                            | Application                                                    |
|--------------------------|------------------------------------------------------------------------------------------------------------------------------------------------|----------------------------------------------------------------|
| scab_57721_+3_NdeI       | TTCATATGCCTGAACCCGTGAATCCGG                                                                                                                    | PCR for cloning <i>scab57721</i> in pET28a                     |
| scab_57721_+1458_HindIII | TTAAGCTTTGGTCCGTCGCTGCCCTACG                                                                                                                   |                                                                |
| imf298                   | CCGTCGGTTCGACACGACCACCAATGGGAGCGCTTCC<br>ATGATTCCGGGGATCCGTCGACC                                                                               | <i>scab57721</i> ( <i>bglC</i> )<br>Redirect deletion cassette |
| imf299                   | GCTCCCCGGCCCCGGCTCCGTGGTCCGTCGCTGCC<br>CTATGTAGGCTGGAGCTGCTTC                                                                                  |                                                                |
| imf300                   | ATGCTGATGTTCTCGTGCAGAC                                                                                                                         | PCR verification of $\Delta$ <i>scab57721</i>                  |
| imf301                   | GAAGACGACGGTGAGGAAGC                                                                                                                           |                                                                |
| imf302                   | GACCTTTCCTCCCGCCTTC                                                                                                                            | <i>scab57721</i> ( <i>bglC</i> )<br>expression analysis        |
| imf303                   | GTGTGACTGAAGGTGTCCCA                                                                                                                           |                                                                |
| imf381                   | <u>AAATCTAG</u> AATGCTGATGTTCTCGTGCAGAC                                                                                                        | Complementation of $\Delta$ <i>scab57721</i>                   |
| imf382                   | <u>AAATCTAG</u> AAGAAGACGACGGTGAGGAAGC                                                                                                         |                                                                |
| Plasmids, cosmids        | Description†                                                                                                                                   | Source or reference                                            |
| pJET1.2/blunt            | <i>E. coli</i> plasmid used for high-efficiency cloning of PCR products ( $Amp^R$ )                                                            | Thermo Scientific                                              |
| pET28a                   | Expression vector used to produce N-terminal His-tagged protein in <i>E. coli</i> ( $Kan^R$ )                                                  | Novagen                                                        |
| pSAJ021                  | pJET1.2 derivative containing the <i>scab57721</i> ( <i>bglC</i> ) coding sequence ( $Amp^R$ )                                                 | This study                                                     |
| pSAJ022                  | pET28a derivative containing the <i>scab57721</i> ( <i>bglC</i> ) coding sequence inserted into NdeI and HindIII restriction sites ( $Kan^R$ ) | This study                                                     |
| pIJ790                   | $\lambda$ Red plasmid ( $t^S$ , $Cml^R$ )                                                                                                      | Gust <i>et al.</i> (2003)                                      |
| pUZ8002                  | Supplies transfer functions for mobilization of <i>oriT</i> -containing vectors from <i>E. coli</i> to <i>Streptomyces</i> ( $Kan^R$ )         | Kieser <i>et al.</i> (2000)                                    |
| pIJ773                   | Template for the REDIRECT® PCR targeting system, contains the [ <i>aac(3)IV+oriT</i> ] disruption cassette ( $Amp^R$ , $Apr^R$ )               | Gust <i>et al.</i> (2003)                                      |
| Supercos1                | SuperCos1 derivative containing the <i>S. scabies</i> 87-22 cellobiose utilization regulator CebR locus ( $Kan^R$ , $Amp^R$ )                  | Stratagene                                                     |
| Cosmid 833               | SuperCos1 derivative containing the <i>S. scabies</i> 87-22 cellobiose/celotriose ABC transporter locus ( $Kan^R$ , $Amp^R$ )                  | Francis <i>et al.</i> (2015)                                   |
| pCR™-BluntII-TOPO        | Cloning vector for PCR products ( $Kan^R$ )                                                                                                    | Invitrogen                                                     |
| pAU3-45                  | pSET152 derivative, integrates into the $\square$ C31 <i>attB</i> site in <i>Streptomyces</i> ( $Apr^R$ , $Thio^R$ )                           | Bignell <i>et al.</i> (2005)                                   |
| pIMF001                  | pAU3-45 derivative containing <i>scab57721</i> and its upstream region cloned into the XbaI site                                               | This study                                                     |

453 \* Non-homologous extensions are underlined, while engineered restriction sites are indicated in italics.

454 †  $Apr^R$ , apramycin resistance;  $Cml^R$ , chloramphenicol resistance;  $t^S$ , temperature sensitive;  $Kan^R$ , kanamycin  
455 resistance;  $Amp^R$ , ampicillin resistance;  $Thio^R$ , thiostrepton resistance

456

457

458

## 459 **Figure legends**

460 **Figure 1. Position of the  $\beta$ -glucosidase activity on the modeled metabolic pathways from**  
461 **cellobiose and cellotriose transport to glycolysis and thaxtomin A production.** When  
462 cellobiose and cellotriose are transported into the cytoplasm through the CebEFG-MsiK  
463 transporter, they both prevent the DNA-binding ability of the repressor CebR (cellobiose does  
464 this much more efficiently than cellotriose; Francis *et al.*, 2015), thus allowing expression of  
465 CebR-controlled genes including the thaxtomin biosynthetic genes (*txt* cluster), *cebEFG* and  
466 *bglC*. Once expressed, BglC cleaves both the imported cellobiose and cellotriose. Cellobiose  
467 hydrolysis directly leads to two glucose molecules, while cellotriose hydrolysis generates first  
468 glucose and cellobiose, the latter being the best allosteric effector of CebR. Cellotriose uptake  
469 would therefore inhibit CebR-mediated repression better than cellobiose uptake. The glucose  
470 generated by the BglC activity will be further metabolized by entering the glycolysis with  
471 phosphorylation by the glucose kinase GlkA to glucose-6-phosphate as the first step.

472

473 **Figure 2. *scab57721* encodes a  $\beta$ -glucosidase.** (A) SDS-PAGE showing the level of purity of  
474 6His-BglC used for enzymatic assays. Lane 1, molecular weight marker; Lane 2, purified  
475 6His-BglC of which the migration size (54 kDa) corresponds well to its predicted calculated  
476 size (54.121 kDa). (B) Initial velocity ( $V_i$ ) of 6His-BglC in function of the cellobiose  
477 concentration. Rates of cellobiose degradation were obtained by measuring the glucose  
478 released at the beginning of the hydrolysis reaction performed in 50 mM HEPES buffer pH  
479 7.5 at 25°C. Data were fitted to the Henri-Michaelis-Menten equation using the GraphPad  
480 Prism 5 software in order obtain  $V_{max}$ ,  $K_m$ , and  $k_{cat}$ . (C) Substrate specificity of 6His-BglC for  
481 cello-oligosaccharides. Cello-oligosaccharides (6.25 mM) were incubated with pure 6His-  
482 BglC (0.4  $\mu$ M) at 30°C for 0, 15, 30 and 60 min. std, standard cello-oligosaccharides: Glc,  
483 glucose; (Glc)<sub>2</sub>, cellobiose; (Glc)<sub>3</sub>, cellotriose; (Glc)<sub>4</sub>, cellotetraose.

484

485 **Figure 3. Expression of *bglC* is repressed by CebR and induced by cellobiose.** (A) qPCR  
486 analysis of *bglC* expression levels in *S. scabies* 87–22 and in the  $\Delta$ *cebR* strain. Data were  
487 normalized using the *gyrA* and *murX* genes as internal controls and using *cebE*, *cebF*, and  
488 *cebR* as CebR repressed genes. Mean normalized expression levels ( $\pm$  standard deviations)  
489 from three biological repeats analyzed in triplicate are shown. (B) Relative normalized  
490 abundancy of BglC peptides in response to the deletion of *cebR* ( $\Delta$ *cebR*) and/or cellobiose  
491 supply, determined by LC-MRM MS on tryptic digests of protein extracts. Target peptides for  
492 BglC: LVDELLAK (BglC1) and TDPVASLR (BglC2). \* denotes significant quantitative  
493 peptide overproduction ( $p < 0.05$ ) compared to the wild-type (WT) strain grown in ISP-4  
494 without cellobiose supply. Statistical significance was assigned by performing 2-sided  
495 Student's t-tests and assuming groups of equal variances. (C) EMSAs showing specific  
496 interaction of CebR with the *cbs* (CebR-binding site) element at position -14 nt upstream of  
497 *bglC*. Probes with the DasR-responsive element (*dre*) upstream of *nagKA* (Tenconi *et al.*,  
498 2015) and with the *cbs* upstream of *cebE* were used as negative and positive controls,  
499 respectively. (D) Overall  $\beta$ -glucosidase activity of *S. scabies* 87-22 and its *bglC* null mutant  
500 grown in liquid ISP4 with or without cellobiose (0.5 mM) supply.

501

502 **Figure 4. Effect of *bglC* deletion on the cello-oligosaccharide-mediated induction of**  
503 **thaxtomin A production.** *S. scabies* 87-22 and its *bglC* null mutant were grown in liquid  
504 MM medium supplemented with 0.5 mM cellobiose or cellotriose. Thaxtomin production was  
505 quantified by HPLC after 24h post-inoculation and wild-type production levels in each  
506 condition were fixed to 100%.

507

508 **Figure 5. Consumption of the cello-oligosaccharides cellobiose and cellotriose (A), and**  
509 **correlation with the intracellular  $\beta$ -glucosidase activity of *S. scabies* wild-type and the**  
510 ***bglC* null mutant (B) and (C).** The BG activity of the wild-type at the first time point was set  
511 to 100%.

512

513 **Figure 6. Thaxtomin A production by *S. scabies* wild-type (87-22) and the *bglC* null**  
514 **mutant grown on various minimal and complex solid media.** (A) Pictures of media  
515 inoculated with *S. scabies* 87-22 and its *bglC* null mutant. Thaxtomin A production can be  
516 seen due to its distinct yellow pigmentation. (B) Quantification of thaxtomin A extracted from  
517 plates shown in A after incubation for 7 days at 28°C. Means and standard deviations were  
518 calculated on three biological replicates. The wild-type production level in TDM cellobiose  
519 was fixed to 100%.

520

521 **Figure 7. Effect of *bglC* deletion on the virulence of *S. scabies*.** (A) Phenotypes of  
522 representative radish seedlings treated with water, the wild-type strain 87-22, and *bglC* mutant  
523 isolates at 6 days post infection. (B) Phenotype of *A. thaliana* grown for 7 days in the  
524 presence of *S. scabies* 87-22 (wild-type) and its *bglC* null mutant with a close-up of  
525 representative plants grown on the MS plates shown in the upper panel.

526

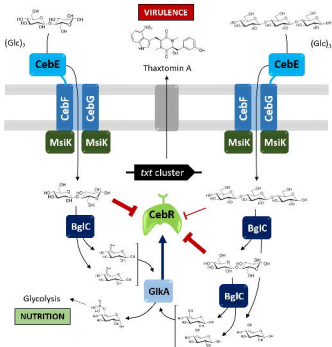



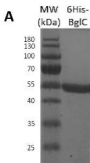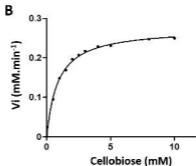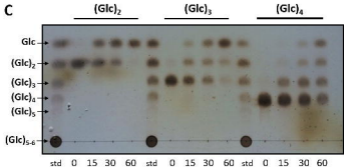

**A**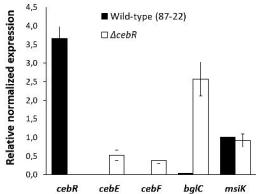**C**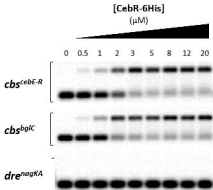

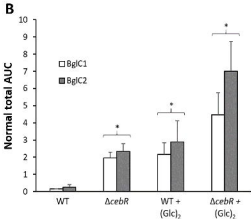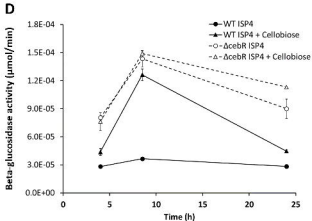

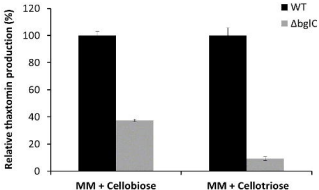

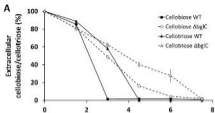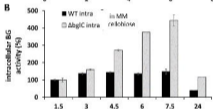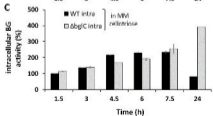

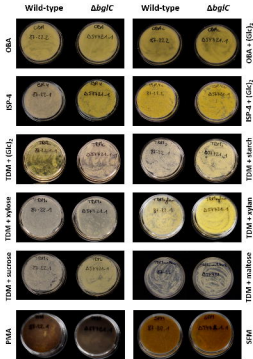

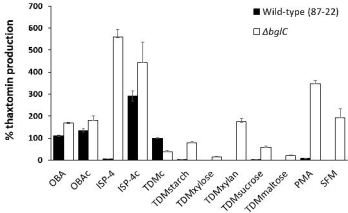

**A**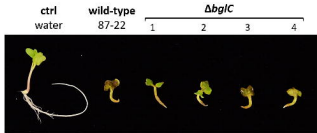**B**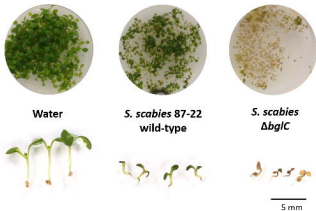



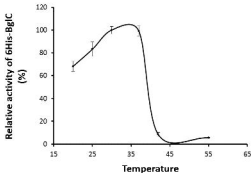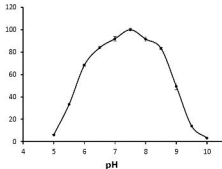

**Fig. S1. Effect of temperature and pH on BglC activity.** The optimal temperature was determined by measuring the relative enzyme activity of BglC (0.2  $\mu$ M) in HEPES 50 mM pH 7.5 at 20, 25, 30, 37 and 42  $^{\circ}$ C. The effect of pH on the relative activity of BglC was assessed in the range of pH 5.0 – 6.5 (50 mM MES buffer), pH 7.0 – 8.5 (50 mM HEPES buffer), and pH 9 – 10 (50 mM CHES buffer) at 25 $^{\circ}$ C.

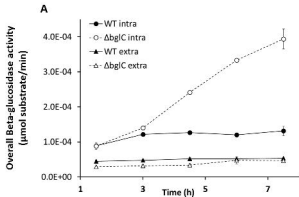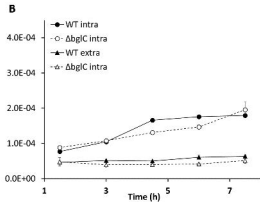

**Fig. S2. Weak overall extracellular Beta-glucosidase activity of *S. scabies* compared to its overall intracellular Beta-glucosidase activity.** Overall intra- and extracellular  $\beta$ -glucosidase activity of *S. scabies* wild-type and its *bgIC* null-mutant grown in MM supplemented with cellobiose (A) and cellotriose (B).

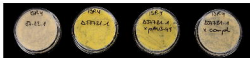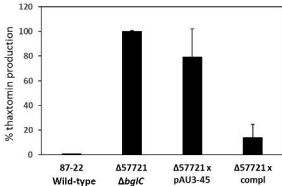

Fig. S3. Complementation of the *bgIC* mutant. The *bgIC* mutant complemented with plasmid pIMF001 carrying the *S. scabiei* *bgIC* gene and its upstream region restored thaxtomin production to the level produced by the wild-type, demonstrating that the phenotype of the mutant is indeed caused by the chromosomal deletion of the *S. scabiei* *bgIC* gene.

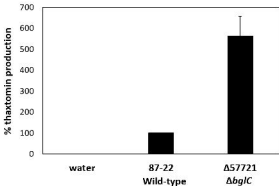

**Fig. S4.** Thaxtomin A production of *S. scabiei* wild-type the *bgIC* mutant when inoculated on radish seedlings. HPLC analysis of thaxtomin extracted from the corresponding radish assays showing that although there is no visual difference in virulence on radish between wild-type and mutant strains (Figure 7A), the *bgIC* mutant isolates produced significantly more thaxtomin than the wild-type bacteria when inoculated on plants.
